1 **Preventive dental visits and health literacy in patients with diabetes: a nationwide**  
2 **cross-sectional study**

3

4 Kyoko Saito, RD, MPH<sup>1, 2</sup>, Yuki Kawai, MD, PhD, MPH<sup>1, 3</sup>, Hirono Ishikawa, PhD<sup>1</sup>,

5 Takahiro Tabuchi, MD, PhD<sup>4</sup>, Keisuke Kuwahara, PhD<sup>1, 5, 6</sup>

6 1 Teikyo University Graduate School of Public Health, Tokyo, Japan

7 2 Kato Clinic of Internal Medicine, Tokyo, Japan

8 3 Department of Medical Science and Cardiorenal Medicine, Yokohama City University

9 Graduate School of Medicine, Yokohama, Japan

10 4 Cancer Control Center, Osaka International Cancer Institute, Osaka, Japan

11 5 Department of Public Health, Yokohama City University School of Medicine

12 6 Department of Health Data Science, Graduate School of Data Science, Yokohama City

13 University

14

15 \*Corresponding to Dr Keisuke Kuwahara

16 Department of Public Health, Yokohama City University School of Medicine

17 3-9 Fukuura, Kanazawa-ku, Yokohama, Kanagawa, Japan

18 TEL: +81-45-787-2610

19 FAX : +81-45-787-2609

20 [kkuwahara@yokohama-cu.ac.jp](mailto:kkuwahara@yokohama-cu.ac.jp)



22 **Abstract**

23 **Aim:** This cross-sectional study examined the association between health literacy and  
24 preventive dental visits in patients with diabetes.

25 **Methods:** We used cross-sectional data from the Japan COVID-19 and Society Internet  
26 Survey (JACSIS), a web-based nationwide survey. The participants were 1,441 patients  
27 reporting to have diabetes in 2020. Health literacy was measured using the validated scales  
28 for health literacy. Preventive dental visits in the past 12 months were self-reported. We  
29 estimated the multivariable-adjusted prevalence ratio (PR) for preventive dental visits.

30 **Results:** Over 50% of the patients had preventive dental visits in the past 12 months, and  
31 approximately one-third had high health literacy. Compared with the low health literacy  
32 group, the high health literacy group was more likely to engage in preventive dental visits  
33 (the multivariable-adjusted PR associated with high health literacy: 1.12 [95% confidence  
34 interval: 1.01 to 1.23]). Similar results were obtained when health literacy was treated as a  
35 continuous variable.

36 **Conclusions:** The present data from the JACSIS showed that health literacy was positively  
37 associated with preventive dental visits among patients with diabetes.

38

39 **Keywords:** diabetes, health literacy, preventive dental visit, cross-sectional study, Japan

40

## 41 **1. Introduction**

42 Diabetes is a growing social and public health issue globally (1) including Japan (2). Recent  
43 statistics estimated that 537 million people worldwide (1) and 10 million in Japan (2) have  
44 diabetes. In patients, poor oral health, as indicated by periodontal disease, has been associated  
45 with an increased risk of diabetic complications, including cardiovascular complications,  
46 retinopathy, end-stage renal disease, and even deaths (3). Therefore, the development of  
47 effective strategies to prevent periodontal disease is needed for patients with diabetes.

48 Both self-care and professional care are important for the prevention of periodontal  
49 diseases (4). Therefore, regular dental visits are recommended for patients, particularly those  
50 with diabetes (4). For example, the Centers for Disease Control and Prevention (5)  
51 recommend getting a dental examinations at least once a year for patients with diabetes. The  
52 American Diabetes Association (6) also recommends comprehensive dental and periodontal  
53 examination for initial care management. However, the rate of dental visits among patients  
54 with diabetes remains low (e.g., 43% in Japan (7) and 61% in the US (8)), which are lower  
55 than those of patients without diabetes (8). This suggests an urgent need to identify  
56 modifiable factors that may promote dental visits among patients with diabetes.

57 Recently, health literacy has gained much attention in promoting behavioral changes (9).  
58 According to the World Health Organization (WHO), health literacy is defined as cognitive  
59 and social skills that determine the motivation and ability of individuals to gain access to,

60 understand and use information in ways that promote and maintain good health'. Based on  
61 this definition, Nutbeam (10) proposed a health literacy model that includes three levels and  
62 assumes both individual and population benefits at each level: (i) functional/basic literacy, (ii)  
63 communicative/interactive literacy, and (iii) critical literacy.

64 The existing literature has shown that among patients with diabetes, health literacy is  
65 associated with self-care behaviors for diabetes (11), glycemic control (12) and retinopathy  
66 (13). Thus, health literacy may be associated with dental visits in patients with diabetes. To  
67 date, only one cross-sectional study has examined this association (14). Furthermore,  
68 although a preventive approach is important in dentistry (4; 5; 15), the previous study (14)  
69 did not distinguish preventive dental visits from traditional curative approaches. In addition,  
70 validity of measuring health literacy was unclear in that study (14). Therefore, we examined  
71 the association between health literacy and preventive dental visits using a validated  
72 questionnaire for health literacy among patients with diabetes in Japan.

73

## 74 **2. Methods**

### 75 *2.1. Study design and data source*

76 This cross-sectional study analyzed the baseline data of the Japan “COVID-19 and Society”  
77 Internet Survey (JACSIS), a web-based, self-reported questionnaire survey (16; 17). A total  
78 of 224,389 panelists aged 15 to 79 years from an internet research agency in Japan (Rakuten

79 Insight, Inc.) were selected from approximately 2.2 million panelists, and asked about their  
80 willingness to participate in the survey. Eligible participants were selected using random  
81 sampling stratified by age, sex, and prefecture to represent the Japanese demographic  
82 composition. Questionnaires were distributed from August 25, 2020 to September 30, 2020;  
83 28,000 respondents aged 15-79 years participated in this survey.

#### 84 *2.2.Participants*

85 Of the 28,000 participants, we sequentially excluded 2,518 participants who provided invalid  
86 responses or met other exclusion criteria as with previous studies (17; 18); first, we excluded  
87 1,955 participants providing invalid responses, using a dummy item stating: “Please choose  
88 the second option from the bottom.” We then excluded 422 participants who provided  
89 artificial or unnatural responses, defined as the use of recreational substances and  
90 medications, including sleeping pills, legal opioids, illegal opioids, organic solvents, designer  
91 drug, cannabis, cocaine. Lastly, we excluded 141 participants having all listed chronic  
92 diseases, including cancer, ischemic heart disease, stroke, diabetes, asthma, mental disorders,  
93 and so on. We additionally excluded one participant who reported an implausible body height  
94 (<100 cm). Of the remaining 25,481 participants (12,808 women and 12,673 men) aged  
95 15-79 years (mean 48.8 years), we extracted the data of 1,441 participants aged 40-79 years  
96 who reported currently having diabetes. We restricted the participants to those aged 40 years  
97 or older because measurement of blood glucose levels and hemoglobin A1c levels are

98 mandatory in this age group in the annual health checkups (19). We expected that the validity  
99 of self-reports on diabetes in this group would be better than that in younger groups. For  
100 sensitivity analyses, we additionally included 258 adults who reported to have diabetes in the  
101 past but not at the time of the study. As diabetes is not a curable disease, we expected that the  
102 participant characteristics would be somewhat different between those who reported having  
103 diabetes currently and those who had diabetes in the past but not currently.

### 104 *2.3.Measurement of health literacy*

105 Health literacy was measured using the Communicative and Critical Health Literacy (CCHL)  
106 scale which has been validated in Japanese (20). This scale measures communicative and  
107 critical health literacy, and comprised three items for communicative health literacy (items  
108 i–iii) and two items for critical health literacy (items iv–v). These items asked whether the  
109 participant were able to (i) collect health-related information from various sources, (ii) extract  
110 the information he wanted, (iii) understand and communicate the obtained information, (iv)  
111 consider the credibility of the information and (v) make decisions based on the information,  
112 specifically in the context of health-related issues (20). Each item is assessed using a  
113 five-point Likert scale ranging from 1 (strongly disagree) to 5 (strongly agree). We then  
114 calculated the total health literacy score by summing the score of each of the five responses  
115 divided by five, yielding scores of 1-5, where higher scores indicate greater health literacy.  
116 We reclassified the participants scoring less than 4 points as those with “low health literacy,”

117 and participants scoring 4-5 points as those with “high health literacy” (20).

#### 118 *2.4.Measurement of past one years’ preventive dental visits*

119 To measure preventive dental visits, respondents were asked, “In the past year, have you  
120 visited a dental clinic?” Dental visits included periodic checkups, dental cleaning, and tartar  
121 removal, but excluded visits for the treatment of cavities. Response options were “Yes” or  
122 “No.” The questionnaire on preventive dental visits was similar to those used in previous  
123 studies (21-23).

#### 124 *2.5.Other Covariates*

125 The participants reported their socio-demographic factors such as age, sex, educational  
126 attainment, marital status, living arrangements, employment status, and annual household  
127 income in the past year (17) as well as health-related data, such as personal history of  
128 diseases, self-rated health, and body weight and height. History of diabetes was reported  
129 through four response options: none, having diabetes in the past but not currently, having  
130 diabetes currently with receiving treatment, having diabetes currently without treatment. In  
131 Japan, self-reported diabetes has been validated by using a similar question (24). Self-rated  
132 health was measured using 5-point scale (25; 26) and participants were classified into two  
133 groups: good (1-3 points) and poor (4-5 points) (25; 26). Body mass index (BMI;  $\text{kg}/\text{m}^2$ ) was  
134 calculated using body weight and height. BMI was reclassified as underweight ( $<18.5 \text{ kg}/\text{m}^2$ ),  
135 normal weight ( $18.5$  to  $<25.0 \text{ kg}/\text{m}^2$ ), and overweight ( $\geq 25.0 \text{ kg}/\text{m}^2$ ).



136 *2.6.Ethics statement*

137 As described previously (17), the present study was conducted in accordance with the ethical  
138 standards of the 1975 Declaration of Helsinki, as revised in 2013. Written informed consent  
139 was obtained from all participants before they responded to the online questionnaire. The  
140 study protocol, including the informed consent procedure, was approved by the ethics  
141 committees of the Osaka International Cancer Institute (no. 20084) and Teikyo University (no.  
142 20-148-3). The Internet Survey Agency complies with the Act on the Protection of Personal  
143 Information in Japan. The data were anonymized; thus, the researchers did not have access to  
144 information that could identify individual participants. The participants were provided a  
145 credit point as an incentive for participation in this study.

146 *2.7.Statistical analysis*

147 Participant characteristics according to preventive dental visits are shown as numbers (%).  
148 We used Poisson regression to estimate multivariable-adjusted prevalence ratios (PRs) and  
149 the 95% confidence intervals (CIs) of preventive dental visits based on health literacy. We  
150 adjusted for age (years, continuous), sex, education attained (junior high school, high school,  
151 vocational school/technical college/junior college, university or higher, and others), marital  
152 status (married, unmarried, divorced, and widowed), living arrangement (living alone and  
153 living with someone), working status (currently working, unemployed or students, and  
154 retired), annual household income in 2019 (<3 million yen, 3 to <5 million yen, 5 to <7

155 million yen,  $\geq 7$  million yen, unclear, and do not want to answer), self-rated health status  
156 (good and poor), and BMI ( $<18.5$ ,  $18.5$  to  $<25.0$ , and  $\geq 25.0$  kg/m<sup>2</sup>). Health literacy was  
157 treated as a dichotomous variable (low and high) and as a continuous variable. We also  
158 performed two sensitivity analyses. First, we conducted a stratified analysis by age ( $<65$   
159 years and  $\geq 65$  years) as older adults would have more dental or periodontal problems. Second,  
160 we conducted the sensitivity analyses by changing the definition of having diabetes as having  
161 diabetes currently or in the past. All analyses were performed using R4.1.3. or Stata 18.0.  
162 Statistical significance was set at  $p < 0.05$  (two-sided).

163

### 164 **3. Results**

165 Of the 1,441 participants who reported currently having diabetes, more than half had gone for  
166 preventive dental visits ( $n = 773$ , 53.6%). The average scores of health literacy was 3.5  
167 (standard deviation: 0.7); approximately one in three patients ( $n = 508$ , 35.3%) had high  
168 health literacy. Table 1 shows the characteristics of the participants according to the number  
169 of preventive dental visits. Those who had preventive dental visits were slightly older,  
170 married or living with someone, likely to have a higher education and higher income, and not  
171 engaged in any work. They were also likely to report good self-rated health status and tended  
172 to have normal weight.

173 Table 2 shows the relationship between preventive dental visits and health literacy.

174 Participants with high health literacy were more likely to have had a preventive dental visit as  
175 compared to those with low health literacy; crude PR of preventive dental visit was 1.18  
176 (95% CI: 1.08 to 1.30) for high health literacy group compared with low health literacy  
177 group. This relationship was slightly attenuated, but remained significant after additional  
178 adjustment for several covariates (aPR=1.12, 95% CI: 1.01, 1.23). A 1-point increase in  
179 health literacy was also significantly associated with preventive dental visits (aPR = 1.09).  
180 Analysis stratified by age groups showed similar point estimates, although some results were  
181 not statistically significant. As shown in Supplementary Tables 1, after enrolling 258  
182 participants who reported having diabetes in the past but not currently, the associations were  
183 slightly weakened and some results became non-significant.

184

## 185 **4. Discussion**

### 186 4.1. Discussion

187 In this cross-sectional study, health literacy was positively associated with preventive dental  
188 visits among patients with diabetes in Japan. The sensitivity analyses supported the main  
189 results. To the best of our knowledge, this is the first study to examine the relationship  
190 between health literacy and preventive dental visits in patients with diabetes.

191 Although there is no directly comparable study, our findings of significant and positive  
192 associations between health literacy and preventive dental visits are in line with at

193 cross-sectional study by Rafferty et al (14). This study showed that individuals with low  
194 health literacy had lower adjusted odds ratios for dental visits; however, it did not distinguish  
195 between dental visits for preventive and treatment purposes, neither did it use any validated  
196 scales to assess health literacy. The present study using validated scales for health,  
197 underscores the importance of health literacy for patients with diabetes in promoting dental  
198 visits for preventive purposes.

#### 199 4.2. Strengths and limitations

200 The strengths of this study include the large-scale sample of more than 1,000 patients  
201 with diabetes, use of a validated health literacy scale, and adjustment for many potential  
202 confounders. However, the results of this study should be interpreted in light of the following  
203 limitations. First, because of its cross-sectional design, it was not possible to confirm  
204 causality. Second, because we did not use objective measurements of glycemic conditions,  
205 patients with undiagnosed diabetes were not included in our analyses. Third, the validity of  
206 self-reported preventive dental visits was unclear, though previous studies have used similar  
207 self-reported questionnaires on dental visits (27; 28). Fourth, since the participants were  
208 recruited through an online survey, they were more likely to have better health literacy than  
209 the general populations. However, the CCHL scores in our study were not significantly  
210 different from those in previous studies (29), in which participants were recruited via mails.  
211 Fifth, although we adjusted for many potential confounders, unmeasured confounding factors

212 including access to medical care may have affected the results. Finally, all participants were  
213 Japanese patients with diabetes. Therefore, caution should be exercised when generalizing the  
214 present findings to populations from other countries.

#### 215 4.3.Conclusion

216 We found that health literacy was significantly associated with preventive dental visits  
217 among patients with diabetes in Japan. Healthcare professionals in diabetes care should  
218 consider patients' health literacy levels to promote preventive dental visits. Further research is  
219 needed to confirm the present results using a longitudinal design and to determine whether  
220 health literacy education can promote preventive dental visits and prevent serious  
221 complications among patients with diabetes.

222

#### 223 **Acknowledgement**

224 The authors are thankful to those who involved in JACSIS.

225

#### 226 **Funding**

227 The conduct of JACSIS 2020 was supported by JSPS KAKENHI Grant Numbers:  
228 JP17H03589, JP19K10671, JP19K10446, JP19K19439, JP18H03107, JP18H03062,  
229 JP21H04856, JP20H03919, Research Support Program to Apply the Wisdom of the  
230 University to tackle COV19 Related Emergency Problems, University of Tsukuba, and

231 Health Labor Sciences Research Grant (grant numbers: 19FA1005, 19FG2001).

232

233 **Data Availability**

234 The data used in the present are not deposited in a public repository due to the containing of

235 personally identifiable or potentially sensitive information. In accordance with the ethical

236 guidelines' regulations in Japan, dissemination of the data is restricted by the Research Ethics

237 Committee of the Osaka International Cancer Institute. Any inquiries regarding the data use

238 should go to Dr Takahiro Tabuchi, [tabuchitak@gmail.com](mailto:tabuchitak@gmail.com). More details of data availability

239 can be found on the website of JACSIS (<https://jacsis-study.jp/howtouse/>).

## References

1. International Diabetes Federation. *IDF Diabetes Atlas, 10th edn*. Brussels: International Diabetes Federation, 2021
2. Ministry of Health, Labour and Welfare. *The National Health and Nutrition Survey in Japan, 2016*. Tokyo: Ministry of Health, Labour and Welfare.
3. Casanova L, Hughes FJ, Preshaw PM. Diabetes and periodontal disease: a two-way relationship. *Br Dent J* 2014;217:433-437
4. Office of Disease Prevention and Health Promotion, Department of Health and Human Service. Healthy People 2030: Oral Conditions. Available from <https://health.gov/healthypeople/objectives-and-data/browse-objectives/oral-conditions>. Accessed 01-24 2024
5. Centers for Disease Control and Prevention. How to Promote Oral Health for People With Diabetes, Available from <https://www.cdc.gov/diabetes/professional-info/health-care-pro/diabetes-oral-health.html>. Accessed 01-24 2024
6. American Diabetes Association. Oral Health. Available from <https://diabetes.org/health-wellness/keeping-your-mouth-healthy>. Accessed 01-24 2024
7. Inagaki K, Kikuchi T, Noguchi T, Mitani A, Naruse K, Matsubara T, Kawanami M, Negishi J, Furuichi Y, Nemoto E, Yamada S, Yoshie H, Tabeta K, Tomita S, Saito A, Katagiri

- S, Izumi Y, Nitta H, Iwata T, Numabe Y, Yamamoto M, Yoshinari N, Fujita T, Kurihara H, Nishimura F, Nagata T, Yumoto H, Naito T, Noguchi K, Ito K, Murakami S, Nishimura R, Tajima N. A large-scale observational study to investigate the current status of diabetic complications and their prevention in Japan (JDCP study 6): baseline dental and oral findings. *Diabetol Int* 2021;12:52-61
8. Luo H, Bell RA, Wright W, Wu Q, Wu B. Trends in annual dental visits among US dentate adults with and without self-reported diabetes and prediabetes, 2004-2014. *J Am Dent Assoc* 2018;149:460-469
9. Sørensen K, Van den Broucke S, Fullam J, Doyle G, Pelikan J, Slonska Z, Brand H, European H-ECHLP. Health literacy and public health: a systematic review and integration of definitions and models. *BMC Public Health* 2012;12:80
10. Nutbeam D. Promoting health and preventing disease: an international perspective on youth health promotion. *J Adolesc Health* 1997;20:396-402
11. Ong-Artborirak P, Seangpraw K, Boonyathee S, Auttama N, Winaiprasert P. Health literacy, self-efficacy, self-care behaviors, and glycemic control among older adults with type 2 diabetes mellitus: a cross-sectional study in Thai communities. *BMC Geriatr* 2023;23:297
12. Alvarez PM, Young LA, Mitchell M, Blakeney TG, Buse JB, Vu MB, Weaver MA, Rees J, Grimm K, Donahue KE. Health Literacy, Glycemic Control, and Physician-Advised Glucose Self-Monitoring Use in Type 2 Diabetes. *Diabetes Spectr* 2018;31:344-347



13. Schillinger D, Grumbach K, Piette J, Wang F, Osmond D, Daher C, Palacios J, Sullivan GD, Bindman AB. Association of health literacy with diabetes outcomes. *JAMA* 2002;288:475-482
14. Rafferty AP, Winterbauer NL, Luo H, Bell RA, Little NRG. Diabetes Self-Care and Clinical Care Among Adults With Low Health Literacy. *J Public Health Manag Pract* 2021;27:144-153
15. World Health Organization. Oral health. <https://www.who.int/news-room/fact-sheets/detail/oral-health> [accessed 2024-01-24].
16. Matsuyama Y, Aida J, Takeuchi K, Koyama S, Tabuchi T. Dental Pain and Worsened Socioeconomic Conditions Due to the COVID-19 Pandemic. *J Dent Res* 2021;100:591-598
17. Kuwahara K, Kato M, Ishikawa H, Shinozaki T, Tabuchi T. Association between watching wide show as a reliable COVID-19 information source and preventive behaviors: A nationwide survey in Japan. *PLOS ONE* 2023;18:e0284371
18. Miyawaki A, Tabuchi T, Tomata Y, Tsugawa Y. Association between participation in the government subsidy programme for domestic travel and symptoms indicative of COVID-19 infection in Japan: cross-sectional study. *BMJ Open* 2021;11:e049069
19. Ministry of Health, Labour and Welfare. *"Specific Health Checkups and Specific Health Guidance"*. (in Japanese) Available from <https://www.mhlw.go.jp/stf/seisakunitsuite/bunya/0000161103.html>. Accessed 1-24 2024

20. Ishikawa H, Nomura K, Sato M, Yano E. Developing a measure of communicative and critical health literacy: a pilot study of Japanese office workers. *Health Promot Int* 2008;23:269-274
21. Foiles Sifuentes AM, Castaneda-Avila MA, Lapane KL. The relationship of aging, complete tooth loss, and having a dental visit in the last 12 months. *Clin Exp Dent Res* 2020;6:550-557
22. Spinler K, Aarabi G, Walther C, Valdez R, Heydecke G, Buczak-Stec E, König HH, Hajek A. Determinants of dental treatment avoidance: findings from a nationally representative study. *Aging Clin Exp Res* 2021;33:1337-1343
23. Zhang Y, Leveille SG, Shi L, Camhi SM. Disparities in Preventive Oral Health Care and Periodontal Health Among Adults With Diabetes. *Prev Chronic Dis* 2021;18:E47
24. Goto A, Morita A, Goto M, Sasaki S, Miyachi M, Aiba N, Kato M, Terauchi Y, Noda M, Watanabe S, Saku Cohort Study G. Validity of diabetes self-reports in the Saku diabetes study. *J Epidemiol* 2013;23:295-300
25. Kawachi I, Kennedy BP, Glass R. Social capital and self-rated health: a contextual analysis. *Am J Public Health* 1999;89:1187-1193
26. Sugisawa H, Harada K, Sugihara Y, Yanagisawa S, Shinmei M. Socioeconomic status and self-rated health of Japanese people, based on age, cohort, and period. *Popul Health Metr* 2016;14:27

27. Sakalauskiene Z, Maciulskiene V, Vehkalahti MM, Kubilius R, Murtomaa H. Characteristics of dental attendance among Lithuanian middle-aged university employees. *Medicina (Kaunas)* 2009;45:312-319
28. Kosteniuk J, D'Arcy C. Dental service use and its correlates in a dentate population: an analysis of the Saskatchewan population health and dynamics survey, 1999-2000. *J Can Dent Assoc* 2006;72:731
29. Kimura N, Kobayashi T. [Association of health literacy with hypertension, diabetes, and dyslipidemia: A cross-sectional survey of a regional Japanese community]. *Nihon Koshu Eisei Zasshi* 2020;67:871-880

Table 1. Participant characteristics according to preventive dental visits among 1,441 diabetic patients

|                                                         | Preventive dental visits |            |
|---------------------------------------------------------|--------------------------|------------|
|                                                         | No                       | Yes        |
| <b>N</b>                                                | 668                      | 773        |
| <b>Sex</b>                                              |                          |            |
| Male                                                    | 495 (74.1)               | 583 (75.4) |
| Female                                                  | 173 (25.9)               | 190 (24.6) |
| <b>Age, years</b>                                       | 62.0±10.5                | 64.9±10.3  |
| <b>Education</b>                                        |                          |            |
| Junior high school                                      | 48 (7.2)                 | 38 (4.9)   |
| High school                                             | 256 (38.3)               | 251 (32.5) |
| Vocational school, technical college, or junior college | 93 (13.9)                | 103 (13.3) |
| University or higher                                    | 270 (40.4)               | 379 (49.0) |
| Others                                                  | 0 (0)                    | 2 (0.2)    |
| <b>Marital status</b>                                   |                          |            |
| Not married (unmarried, divorce, widowed)               | 211 (31.6)               | 176 (22.8) |
| Married                                                 | 457 (68.4)               | 597 (77.2) |
| <b>Living arrangement</b>                               |                          |            |

|                                          |            |            |
|------------------------------------------|------------|------------|
| Living alone                             | 127 (19.0) | 119 (15.4) |
| Living with someone                      | 541 (81.0) | 654 (84.6) |
| <b>Working status</b>                    |            |            |
| Currently working                        | 375 (56.1) | 384 (49.7) |
| Unemployed or students                   | 235 (35.2) | 284 (36.7) |
| Retired                                  | 58 (8.7)   | 105 (13.6) |
| <b>Annual household income last year</b> |            |            |
| <3 million yen                           | 155 (23.2) | 161 (20.8) |
| 3 million to <5 million yen              | 139 (20.8) | 198 (25.6) |
| 5 to <7 million yen                      | 96 (14.4)  | 102 (13.2) |
| ≥7 million yen                           | 142 (21.3) | 180 (23.3) |
| Unclear or do not want to answer         | 136 (20.4) | 132 (17.1) |
| <b>Self-rated health</b>                 |            |            |
| Poor                                     | 210 (31.4) | 190 (24.6) |
| Good                                     | 458 (69.6) | 583 (75.4) |
| <b>Body mass index</b>                   |            |            |
| <18.5 kg/m <sup>2</sup>                  | 23 (3.4)   | 26 (3.4)   |
| 18.5 to <25.0 kg/m <sup>2</sup>          | 336 (50.3) | 440 (55.9) |
| ≥25.0 kg/m <sup>2</sup>                  | 309 (46.3) | 307 (39.7) |

|                         |           |           |
|-------------------------|-----------|-----------|
| Health literacy, scores | 3.4 ± 0.7 | 3.5 ± 0.7 |
|-------------------------|-----------|-----------|

---

Data are shown as n (%) or mean ± standard deviation).

Table 2. Prevalence ratios and 95% confidence intervals of preventive dental visits by health literacy among diabetic patients

|                               | N   | Events     | Unadjusted model    |         | Adjusted model*     |         |
|-------------------------------|-----|------------|---------------------|---------|---------------------|---------|
|                               |     |            | PR (95% CI)         | P value | PR (95% CI)         | P value |
| <b>All participants</b>       |     |            |                     |         |                     |         |
| Low (<4 points)               | 933 | 470 (50.4) | Reference           |         | Reference           |         |
| High (≥ 4 points)             | 508 | 303 (59.7) | 1.18 (1.08 to 1.30) | 0.001   | 1.12 (1.01 to 1.23) | 0.027   |
| 1 point increase (continuous) |     |            | 1.13 (1.05 to 1.22) | 0.001   | 1.09 (1.01 to 1.17) | 0.028   |
| <b>Aged &lt;65 years</b>      |     |            |                     |         |                     |         |
| Low (<4 points)               | 357 | 183 (42.5) | Reference           |         | Reference           |         |
| High (≥ 4 points)             | 304 | 121 (52.6) | 1.24 (1.05 to 1.46) | 0.011   | 1.19 (1.01 to 1.41) | 0.043   |
| 1 point increase (continuous) |     |            | 1.11 (0.99 to 1.25) | 0.085   | 1.07 (0.95 to 1.20) | 0.29    |
| <b>Aged ≥65 years</b>         |     |            |                     |         |                     |         |

|                                            |     |            |                     |       |                     |       |
|--------------------------------------------|-----|------------|---------------------|-------|---------------------|-------|
| Low (<4 points)                            | 502 | 287 (57.2) | Reference           |       | Reference           |       |
| High ( $\geq$ 4 points)                    | 278 | 182 (65.5) | 1.15 (1.02 to 1.28) | 0.02  | 1.09 (0.97 to 1.22) | 0.15  |
| 1 point increase (continuous) <sup>†</sup> |     |            | 1.14 (1.04 to 1.24) | 0.006 | 1.10 (1.00 to 1.21) | 0.045 |

Abbreviations: CI, confidence interval; PR, prevalence ratio.

\* Adjusted for sex, age, education, marital status, living arrangement, working status, annual household income, self-rated health, and body-mass index.
