# Supplementary material for: Preventive dental visits and health literacy in patients with diabetes: a nationwide cross-sectional study
Source: bioRxiv or medRxiv preprint supplement (doi:10.1101/2024.07.01.24309770), 2024-07-03
Supplement: Supplementary file [file media-1.pdf]

**Supplementary Table 1. Prevalence ratios and 95% confidence intervals of preventive dental visits and health literacy after including participants who reported to have diabetes in the past but not currently**

|                                       | N     | Events     | Unadjusted model    |         | Adjusted model*     |         |
|---------------------------------------|-------|------------|---------------------|---------|---------------------|---------|
|                                       |       |            | PR (95% CI)         | P value | PR (95% CI)         | P value |
| <b>All participants</b>               |       |            |                     |         |                     |         |
| Low (<4 points)                       | 1,110 | 557 (50.2) | Reference           |         | Reference           |         |
| High ( $\geq$ 4 points)               | 589   | 341 (57.9) | 1.15 (1.05 to 1.27) | 0.002   | 1.09 (0.99 to 1.19) | 0.064   |
| 1 point increase (continuous)         |       |            | 1.11 (1.05 to 1.20) | 0.001   | 1.07 (1.00 to 1.15) | 0.047   |
| <b>Aged &lt;65 years</b>              |       |            |                     |         |                     |         |
| Low (<4 points)                       | 513   | 216 (42.1) | Reference           |         | Reference           |         |
| High ( $\geq$ 4 points)               | 273   | 142 (52.0) | 1.24 (1.06 to 1.44) | 0.007   | 1.17 (1.00 to 1.36) | 0.055   |
| 1 point increase (continuous)         |       |            | 1.13 (1.01 to 1.26) | 0.029   | 1.09 (0.97 to 1.22) | 0.15    |
| <b>Aged <math>\geq</math>65 years</b> |       |            |                     |         |                     |         |
| Low (<4 points)                       | 597   | 341 (57.1) | Reference           |         | Reference           |         |
| High ( $\geq$ 4 points)               | 316   | 199 (63.0) | 1.10 (0.99 to 1.23) | 0.081   | 1.06 (0.95 to 1.19) | 0.27    |
| 1 point increase (continuous)         |       |            | 1.09 (1.00 to 1.19) | 0.039   | 1.06 (0.97 to 1.16) | 0.17    |

Abbreviations: CI, confidence interval; PR, prevalence ratio.

\*Adjusted for sex, age, education, marital status, living arrangement, working status, annual household income, self-rated health, and body-mass index.
